# Supplementary material for: Highly conductive flat grains of cesium lead bromide perovskites via additive engineering with methylammonium bromide
Source: Royal Society of Chemistry journal article supplement (doi:10.1039/d4ya00487f), 2024-01-01
Supplement: d4ya00487f1.pdf [file d4ya00487f1.pdf]

## Supporting information

### **Highly Conductive Flat Grains of Cesium Lead Bromide Perovskite via Additive Engineering with Methylammonium Bromide**

Chandra Shakher Pathak<sup>1,2 \*</sup>, Deepak Aloysius<sup>3</sup>, Satyajit Gupta<sup>3,\*</sup>, Sabyasachi Mukhopadhyay<sup>4</sup>  
and Eran Edri<sup>1</sup>

<sup>1</sup>Department of Chemical Engineering, Ben-Gurion University of the Negev Beer Sheva, Israel-8410501

<sup>2</sup>Department of Physics, BMS Institute of Technology and Management, Avalahalli, Bengaluru, India-560064

<sup>3</sup>Department of Chemistry, Indian Institute of Technology Bhilai, Chhattisgarh, India-492015

<sup>4</sup>Department of Physics, SRM University - AP, Andhra Pradesh, India-522240

\*To whom correspondence should be addressed: [cspathak12@gmail.com](mailto:cspathak12@gmail.com), [satyajit@iitbhilai.ac.in](mailto:satyajit@iitbhilai.ac.in)

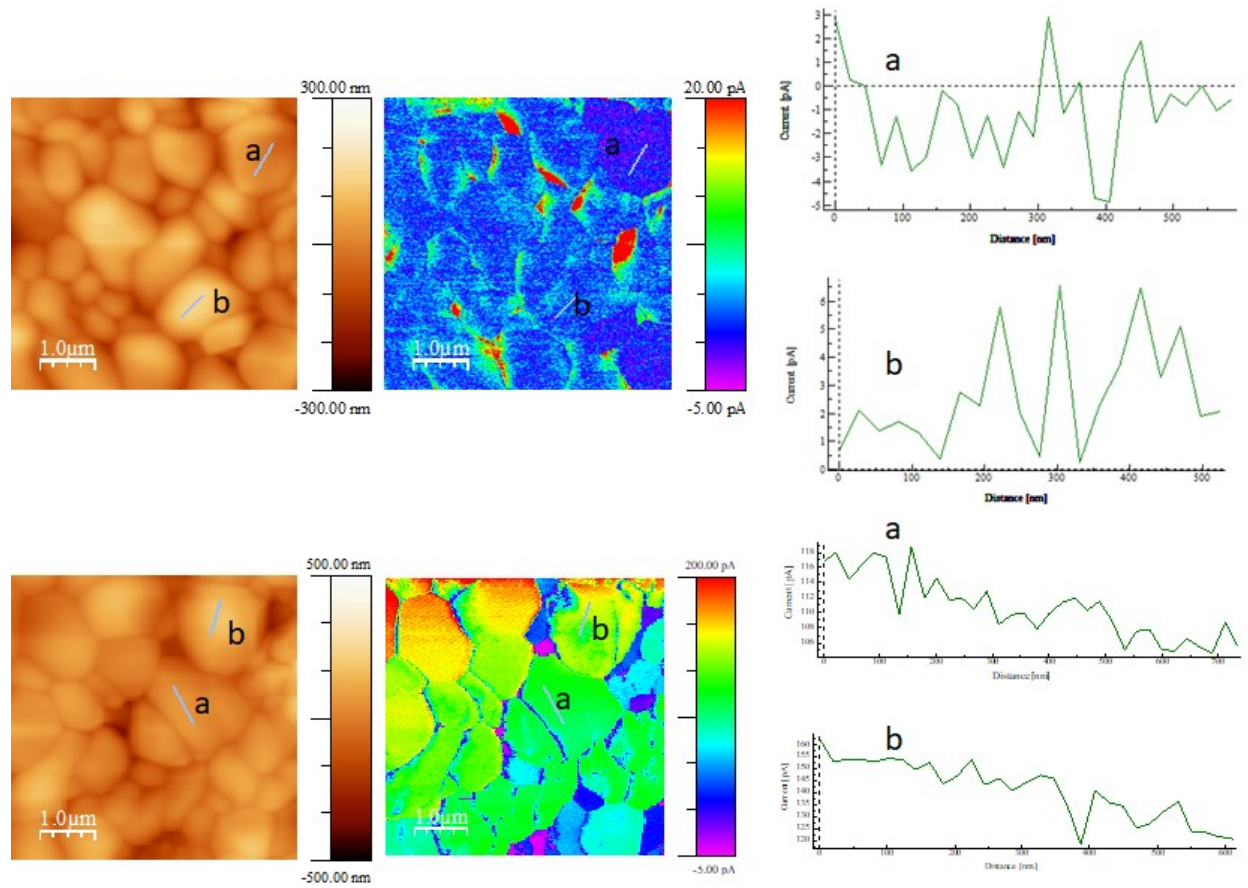

**Figure S1.** Topography, corresponding current maps and line section of (top) bare, (bottom) perovskite-15 mg MABr film with 0.5 V under illumination. a. represent flat grain and b. rounded grain.

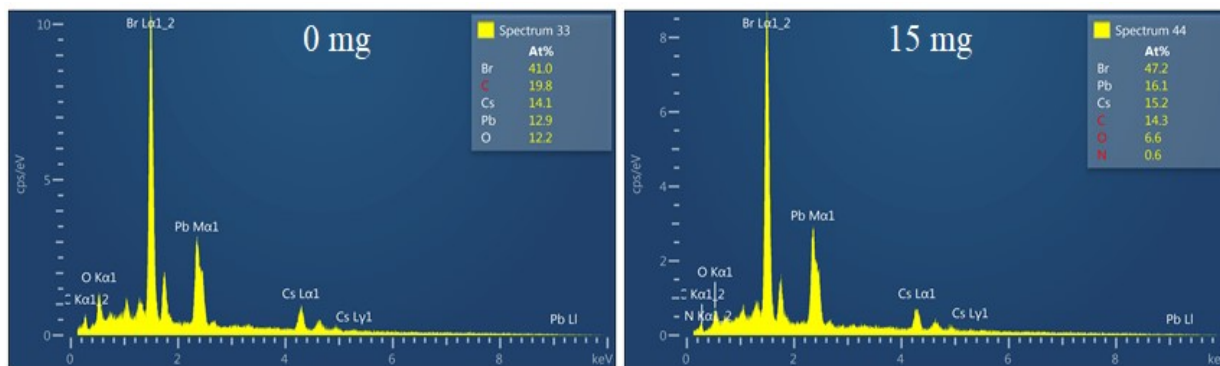

**Figure S2.** EDX spectra of 0 mg and 15 mg MABr- perovskite films

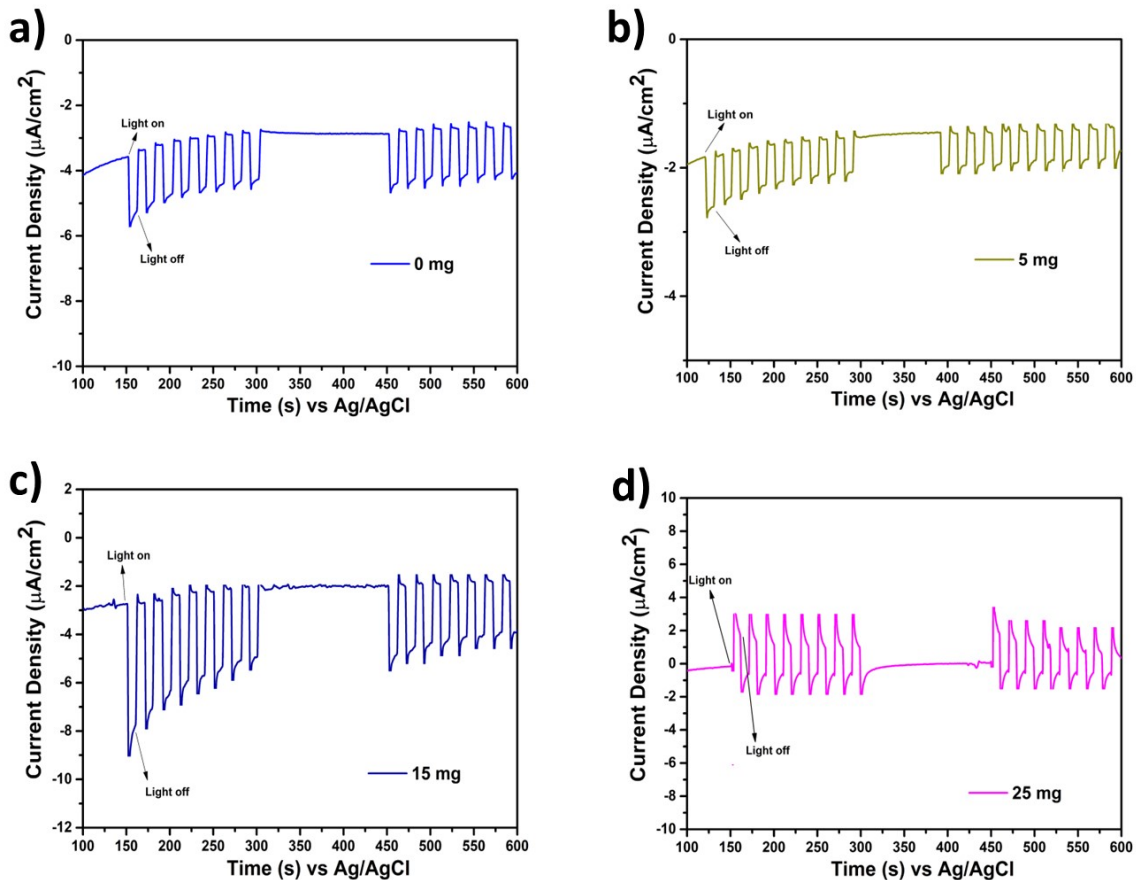

**Figure S3:** Chronoamperometric plots of CsPbBr<sub>3</sub> perovskites incorporated with a) 0 mg, b) 5 mg, c) 15 mg, and d) 25 mg, MABr respectively

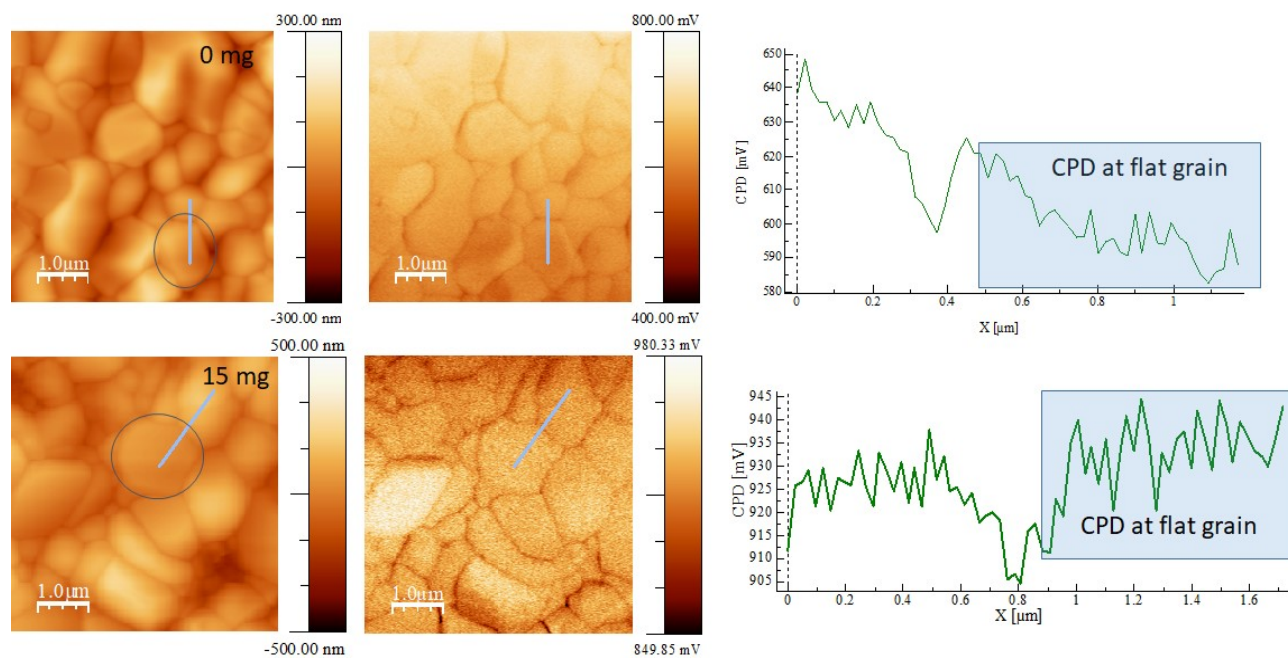

**Figure S4.** Height, CPD map and line section of rounded and flat grain of 0 mg and 15 mg MABr-perovskite films, the circle shows the flat grain. In x- axis X denotes distance.

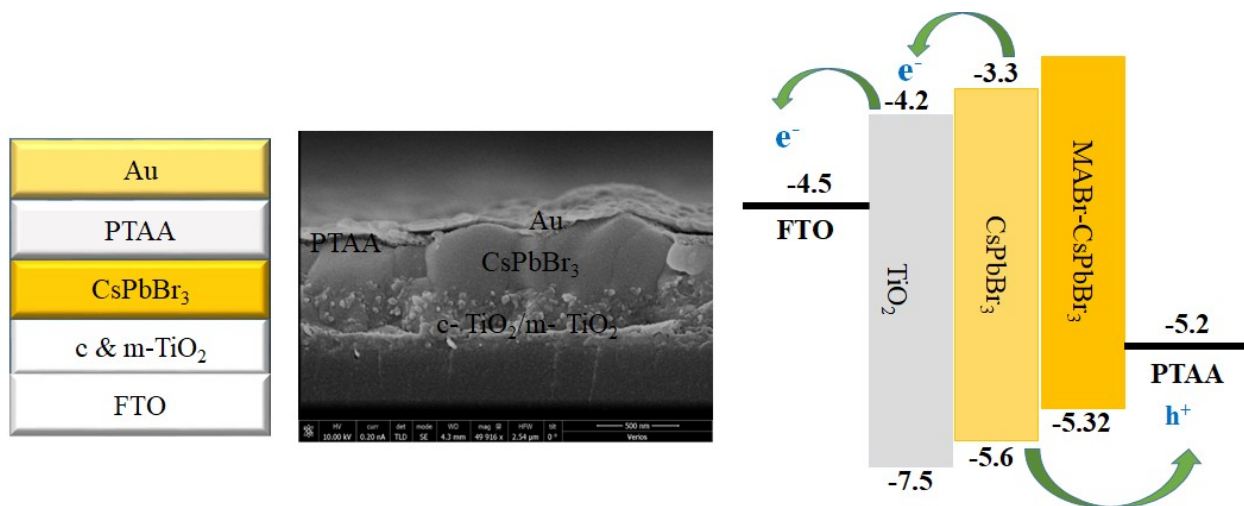

**Figure S5.** Cross-sectional SEM of CSPbBr<sub>3</sub> PSC and energy diagram

**Table S1.** Atomic% of different composition of perovskite film deduced from XPS

| sample | Pb 4f, | Cs 3d, | Br 3d | O 1S  | N 1S |
|--------|--------|--------|-------|-------|------|
| 0 mg   | 12.66  | 14.84  | 35.25 | 37.25 | 0    |
| 15 mg  | 16.41  | 17.91  | 44.61 | 19.34 | 1.74 |

| <b>MABr</b>              | <b>Jsc<br/>( mA/cm<sup>2</sup>)</b> | <b>Voc (V)</b> | <b>FF (%)</b> | <b>PCE (%)</b> |
|--------------------------|-------------------------------------|----------------|---------------|----------------|
| 0 mg                     | 4.80 ±0.24                          | 0.96± 0.09     | 38.35± 3.15   | 1.88 ±0.30     |
| Champion cell            | 6.30                                | 1.02           | 35.91         | 2.23           |
| 5 mg, Average<br>values  | 5.80± 1.01                          | 0.89 ±0.099    | 33.65±6.77    | 1.74 ± 0.46    |
| Champion cell            | 5.27                                | 1.04           | 43.5          | 2.39           |
| 15 mg, Average<br>values | 8.64± 0.51                          | 1.03 ±0.008    | 37.70 ±0.54   | 3.36±0 .27     |
| Champion cell            | 8.99                                | 1.04           | 38.1          | 3.55           |
| 25 mg, Average           | 6.52 ±3.86                          | 0.718± 0.31    | 32.30 ±8.17   | 1.17 ±0.099    |

|               |      |      |       |      |
|---------------|------|------|-------|------|
| values        |      |      |       |      |
| Champion cell | 3.36 | 0.98 | 38.74 | 1.28 |

**Table S2.**  
Photo

voltaic parameters of CsPbBr<sub>3</sub> -PSCs with MABr

Table S3. Molar ratio of CsBr:MABr

| <b>Precursor solution</b> | <b>Concentration of CsBr (M)</b> | <b>Concentration of MABr (M)</b> | <b>Molar ratio (CsBr:MABr)</b> |
|---------------------------|----------------------------------|----------------------------------|--------------------------------|
|---------------------------|----------------------------------|----------------------------------|--------------------------------|

|            |      |      |      |
|------------|------|------|------|
| 0 mg MABr  | 0.07 | 0    |      |
| 5 mg MABr  | 0.07 | 0.04 | 7:4  |
| 15 mg MABr | 0.07 | 0.13 | 7:13 |
| 20 mg MABr | 0.07 | 0.22 | 7:22 |
